# Supplementary material
Source: publisher site journal article supplement (https://www.dovepress.com/article/358708)
Supplement: Supplementary file 1 [file get_supplementary_file.php]

| Supplementary table 1. Characteristics of the included and excluded polyps. | | |
| --- | --- | --- |
| Characteristics | Included specimen pairs (n=1,739) | Excluded resected specimen (n=2,864) |
| Size of polyps |  |  |
| <10mm | 873 (50.2%) | 2103 (73.4%) |
| 10~20mm | 762 (43.8%) | 707 (24.7%) |
| >20mm | 104 (6.0%) | 54 (1.9%) |
| P value |  | <0.001 |
| Lesion type |  |  |
| Ip | 1004 (28.9%) | 788 (27.5%) |
| Is | 2474 (71.1%) | 2076 (72.5%) |
| P value |  | 0.245 |

| Supplementary table 2. The concordance of dysplasia and villousness of each pathologist | | | |
| --- | --- | --- | --- |
|  | concordance of dysplasia | concordance of villousness | Total cases |
| A | 233 (82.0%) | 214 (75.4%) | 284 |
| B | 149 (81.9%) | 116 (63.7%) | 182 |
| C | 166 (85.6%) | 143 (73.7%) | 194 |
| D | 37 (80.4%) | 29 (63.0%) | 46 |
| E | 7 (87.5%) | 6 (75.0%) | 8 |
| F | 310 (86.4%) | 283 (78.8%) | 359 |
| G | 19 (61.3%) | 18 (58.1%) | 31 |
| H | 11 (78.6%) | 8 (57.1%) | 14 |
| I | 268 (85.9%) | 242 (77.6%) | 312 |
| J | 1 (100.0%) | 0 (0.0%) | 1 |
| K | 37 (75.5%) | 33 (67.3%) | 49 |
| L | 31 (81.6%) | 28 (73.7%) | 38 |
| M | 13 (81.2%) | 13 (81.2%) | 16 |
| N | 187 (91.2%) | 163 (79.5%) | 205 |
